# Supplementary material
Source: PubMed Central journal article supplement (PMC6150427)
Supplement: DC180774SupplementaryData.pdf [file DC180774SupplementaryData.pdf]

Supplementary Figure 1. Participant Flow

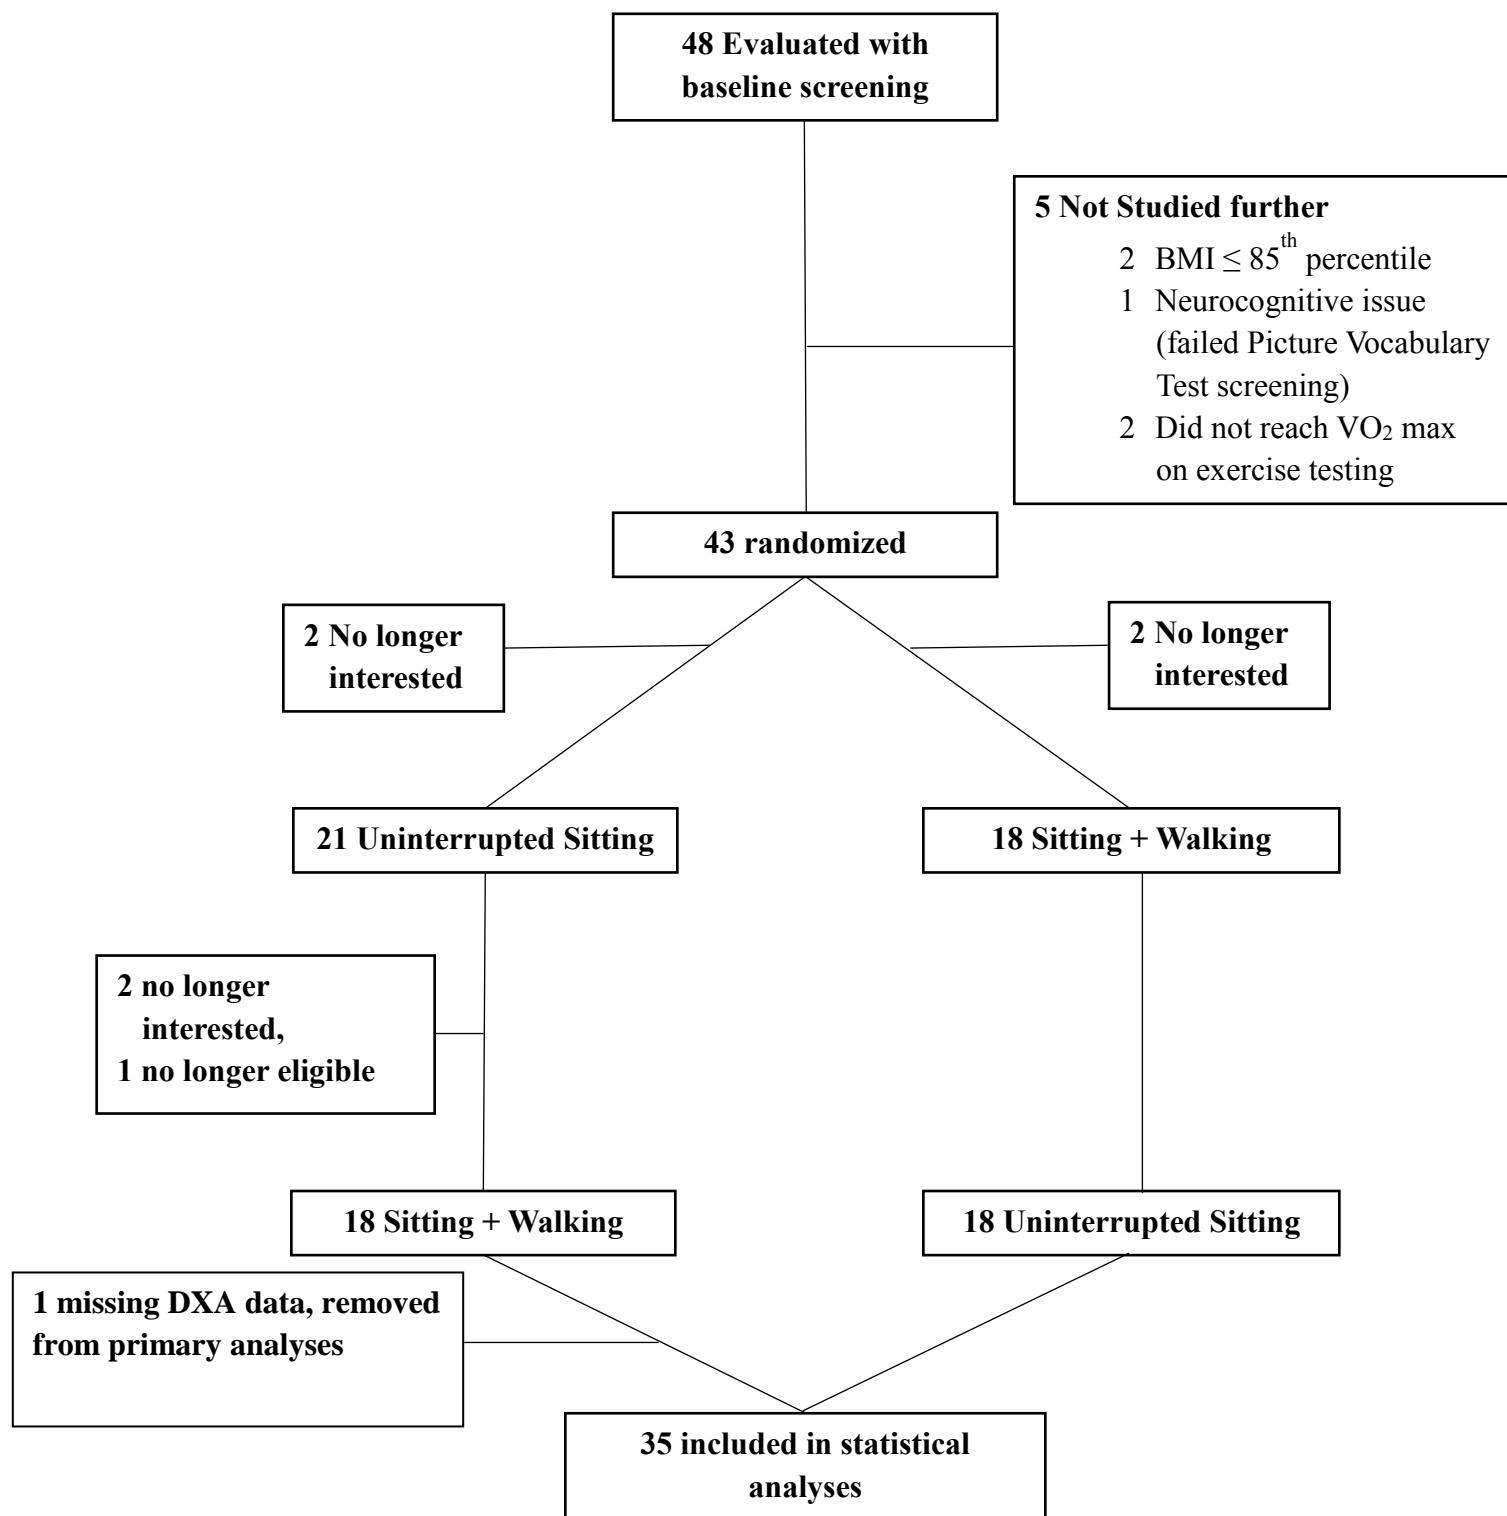

SUPPLEMENTARY DATA

Supplementary Figure 2

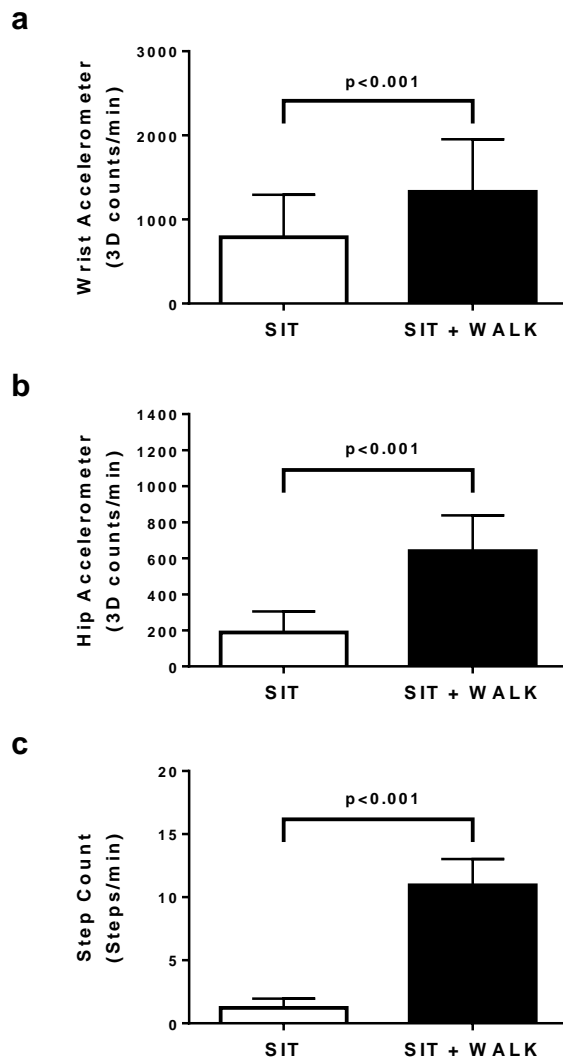

Activity during walking vs. sitting visits. Mean  $\pm$ SE mounted tri-axial vector magnitude counts per minute for wrist (a) and hip (b) accelerometers, used to calculate step count (c) over the entire 3 hour period of the SIT + WALK condition (black bars), when participants walked on the treadmill 3 minutes of each 30 minute period, versus the same 3- hour period of the SIT condition (white bars), when participants engaged in sedentary activities only.

## SUPPLEMENTARY DATA

### Supplementary Material

#### Calculating Glucose Effectiveness

Glucose effectiveness was calculated using the analytical approaches reported by Nagasaka et al (1) and Weiss et al (2) as follows:

Units for calculation: glucose = mg/dL, insulin = mcU/mL

1. Determine: Post load plasma glucose without insulin / without GE [**PGwoI/GE**]  
Post load plasma glucose = Fasting Plasma Glucose =  $[0.75 \times 75000] / [0.19 \times \text{body weight (kg)} \times 10]$
2. Determine: Expected 2 hour plasma glucose [**2hrPG<sub>exp</sub>**]
  - NGT: 2-hr Glucose =  $133.01 - 24.22 \times \text{Log(oDI)}$
  - IGT/IFG: 2-hr Glucose =  $160.05 - 19.14 \times \text{Log(oDI)}$
  - (Regressions provided by Weiss et al (2))
  - Oral disposition index (oDI) = Matsuda Index \* Insulinogenic Index
  - Matsuda Index =  $10,000 / \sqrt{(\text{fasting glucose} \times \text{fasting insulin} \times \text{mean glucose} \times \text{mean insulin})}$  (3)
  - Insulinogenic Index =  $\Delta \text{ Insulin (time 0-time 30)} / \Delta \text{ Glucose (time 0-time 30)}$
3. Calculate glucose effectiveness index (GE). This requires the two terms calculated above which are unique for each subject in addition to the unique, measured 2hrPG and the constant PGwoI/wGE as follows:

$$\text{GE (mg/dl per min)} = \{ \text{PGwoI/GE} - [\text{PGwoI/wGE}] * (\text{2hrPG} / \text{2hrPG}_{\text{exp}}) \} / 120$$

-Post load plasma glucose without insulin / with GE [**PGwoI/wGE**]: The following constant was used for each subject depending on their degree of glucose tolerance: normal glucose tolerance (NGT) or impaired glucose tolerance (IGT) or impaired fasting glucose (IFG)

NGT: 160.85

IGT/IFG: 184.79

Details of the data set and analysis used to obtain these constants can be found within the original description reported by Weiss et al. (2)

-**2hrPG**: The measured 2hr plasma glucose

#### References:

1. Nagasaka S, Kusaka I, Yamashita K, Funase Y, Yamauchi K, Katakura M, Ishibashi S, Aizawa T: Index of glucose effectiveness derived from oral glucose tolerance test. Acta Diabetol 2012;49 Suppl 1:S195-204

## SUPPLEMENTARY DATA

2. Weiss R, Magge SN, Santoro N, Giannini C, Boston R, Holder T, Shaw M, Duran E, Hershkop KJ, Caprio S:

Glucose effectiveness in obese children: relation to degree of obesity and dysglycemia. *Diabetes Care*

2015;38:689-695

3. Matsuda M, DeFronzo RA: Insulin sensitivity indices obtained from oral glucose tolerance testing: comparison

with the euglycemic insulin clamp. *Diabetes Care* 1999;22:1462-1470
